# Supplementary material for: Re-expression of HPV16 E2 in SiHa (human cervical cancer) cells potentiates NF-κB activation induced by TNF-α concurrently increasing senescence and survival
Source: PubMed Central journal article supplement (PMC4340273; doi:10.1042/bsr20140160), 2015-02-25
Supplement: bsr035e175ntsadd.pdf [file bsr035e175ntsadd.pdf]

**Supplementary Table 1** List of primers used for qPCR and their corresponding annealing temperatures. The cycling conditions were: 95°C for 10 min, followed by 40 cycles of 95°C for 15 sec, T<sub>m</sub> for 20 sec and 62°C for 15 sec.

| <b>GENE</b> |         | <b>SEQUENCE (5'-3')</b>   | <b>Annealing temperature</b> |
|-------------|---------|---------------------------|------------------------------|
| cyc D1      | Forward | CCGTCCATGCGGAAGATC        | 62°C                         |
|             | Reverse | ATGGCCAGCGGGAAGAC         |                              |
| c-Myc       | Forward | TCAAGAGGTGCCACGTCTCC      | 62°C                         |
|             | Reverse | TCTTGGCAGCAGGATAGTCCTT    |                              |
| survivin    | Forward | AGAACTGGCCCTTCTTGGGGTC    | 60°C                         |
|             | Reverse | CTTTTTATGTTCTCTATGGGGTC   |                              |
| hTERT       | Forward | AAGTTCCTGCACTGGCTGAT      | 60°C                         |
|             | Reverse | CACGACGTAGTCCATGTTC       |                              |
| HPV16 E6    | Forward | TGCAATGTTTCAGGACCCA       | 60°C                         |
|             | Reverse | CATGTATAGTTGTTTGCAGCTCTGT |                              |
| IL-6        | Forward | TACCCCCAGGAGAAGATTCC      | 60°C                         |
|             | Reverse | GCCATCTTTGGAAGGTTTCAG     |                              |
| IL-8        | Forward | AGGTGCAGTTTTGCCAAGGA      | 60°C                         |
|             | Reverse | TTTCTGTGTTGGCGCAGTGT      |                              |
| β-actin     | Forward | TCATGAAGATCCTCACCGAG      | 58°C                         |
|             | Reverse | TTGCCAATGGTGATGACCTG      |                              |
